# Supplementary material for: Topological defects and geometric memory across the nematic–smectic A liquid crystal phase transition
Source: Royal Society of Chemistry journal article supplement (doi:10.1039/c9sm00781d), 2019-01-01
Supplement: c9sm00781d1.pdf [file c9sm00781d1.pdf]

## Electronic Supplementary Information

### **Topological defects and geometric memory across the nematic-smectic A liquid crystal phase transition**

*Ahram Suh, ‡<sup>a</sup> Min-Jun Gim, ‡<sup>a</sup> Daniel Beller \*<sup>b</sup> and Dong Ki Yoon \*<sup>ac</sup>*

<sup>a</sup>Graduate School of Nanoscience and Technology, KAIST, Daejeon, 34141, Republic of Korea

E-mail: dbeller@ucmerced.edu (D.A.B.); nandk@kaist.ac.kr (D.K.Y.)

<sup>b</sup>Department of Physics, University of California, Merced, CA 95343, USA

<sup>c</sup>Department of Chemistry and KINC, KAIST, Daejeon, 34141, Republic of Korea

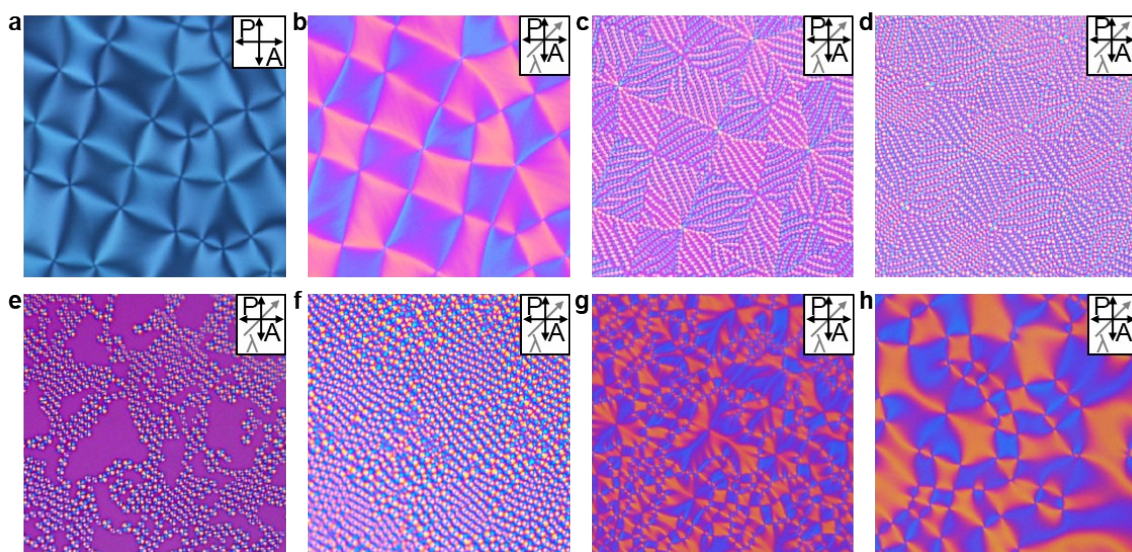

**Fig. S1 Optical microscopic observation of hysteresis of boojums during thermal process.** (a)-(e) Cooling process. (e)-(h) Heating process. Gray arrow indicates the slow axis of the inserted retardation plate, wherein cyan blue or yellow colours are shown when LC molecular long axis is parallel or perpendicular to the slow axis of the retardation plate, respectively. When the molecules orient parallel, perpendicular or vertical to polarisers, magenta is observed. Defects lose their position and configuration when they cooled to TFCs at SmA phase.

**Movie S1   Thermal reversibility investigation of the defects.**

**Movie S2   Hysteresis of boojums during thermal process.**
